# Supplementary material for: Longitudinal evolution of non-motor symptoms in early Parkinson’s disease: a 3-year prospective cohort study
Source: PubMed Central journal article supplement (PMC8282608; doi:10.1038/s41531-021-00207-5), 2021-07-15
Supplement: 41531_2021_207_MOESM1_ESM.pdf [file 41531_2021_207_MOESM1_ESM.pdf]

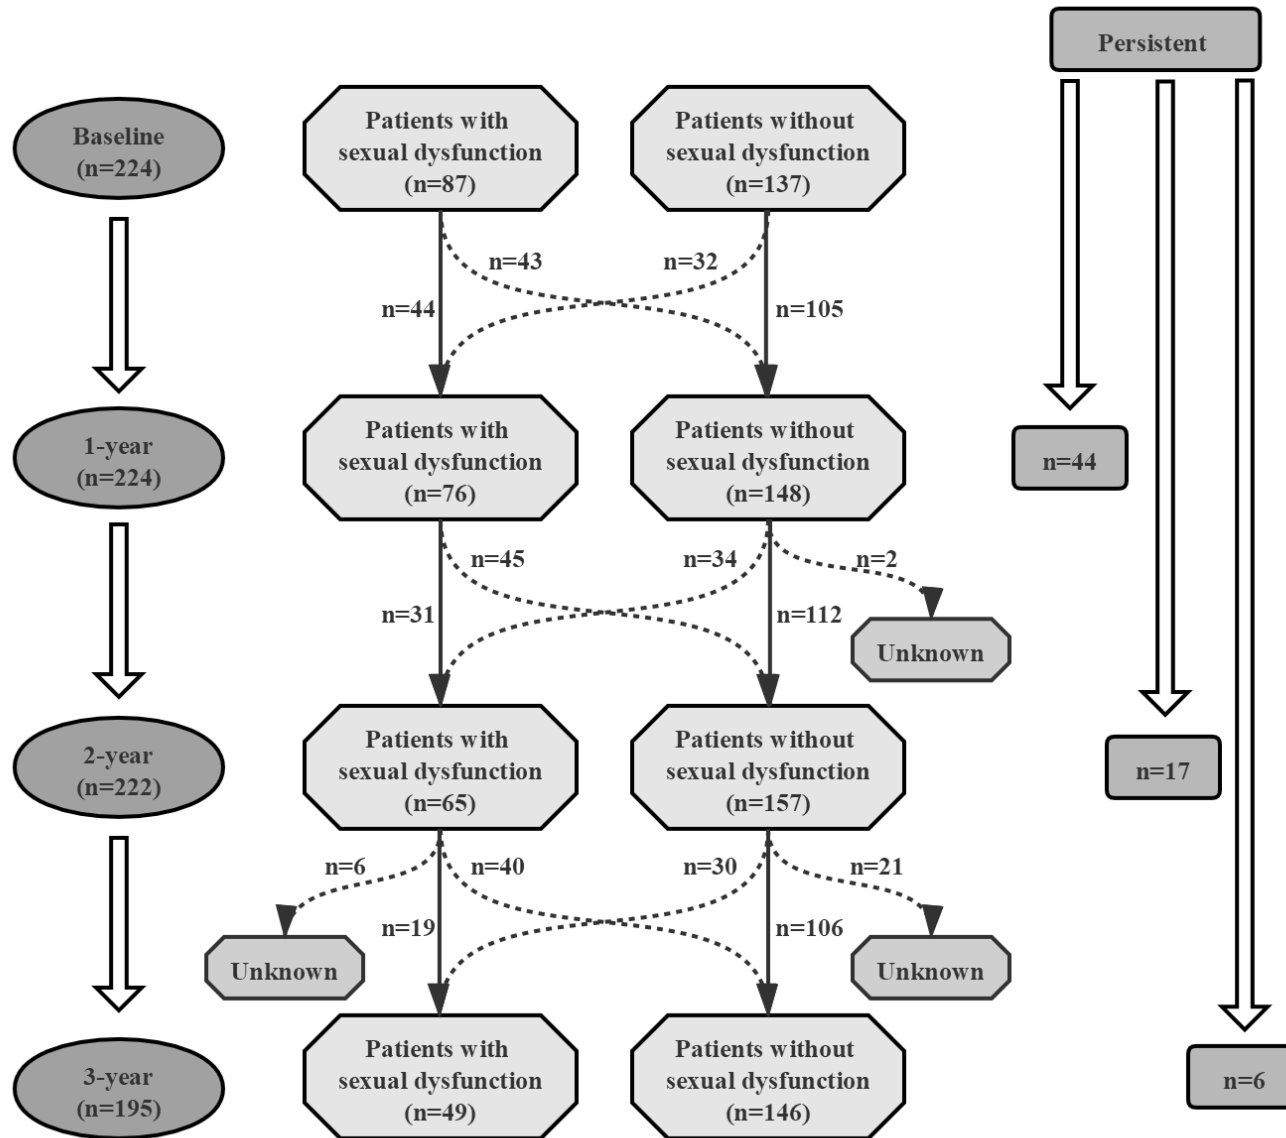

**Supplementary Figure 1 Longitudinal evolution of sexual dysfunction in patients with PD over 3 years**

The numbers of sexual dysfunction in patients with PD were decreased from baseline to 3-year (87 to 49), and the occurrence of sexual dysfunction was not persistent. The numbers of persistent sexual dysfunction from baseline, 1-, 2-, and 3-year were 44, 17, and 6, respectively.

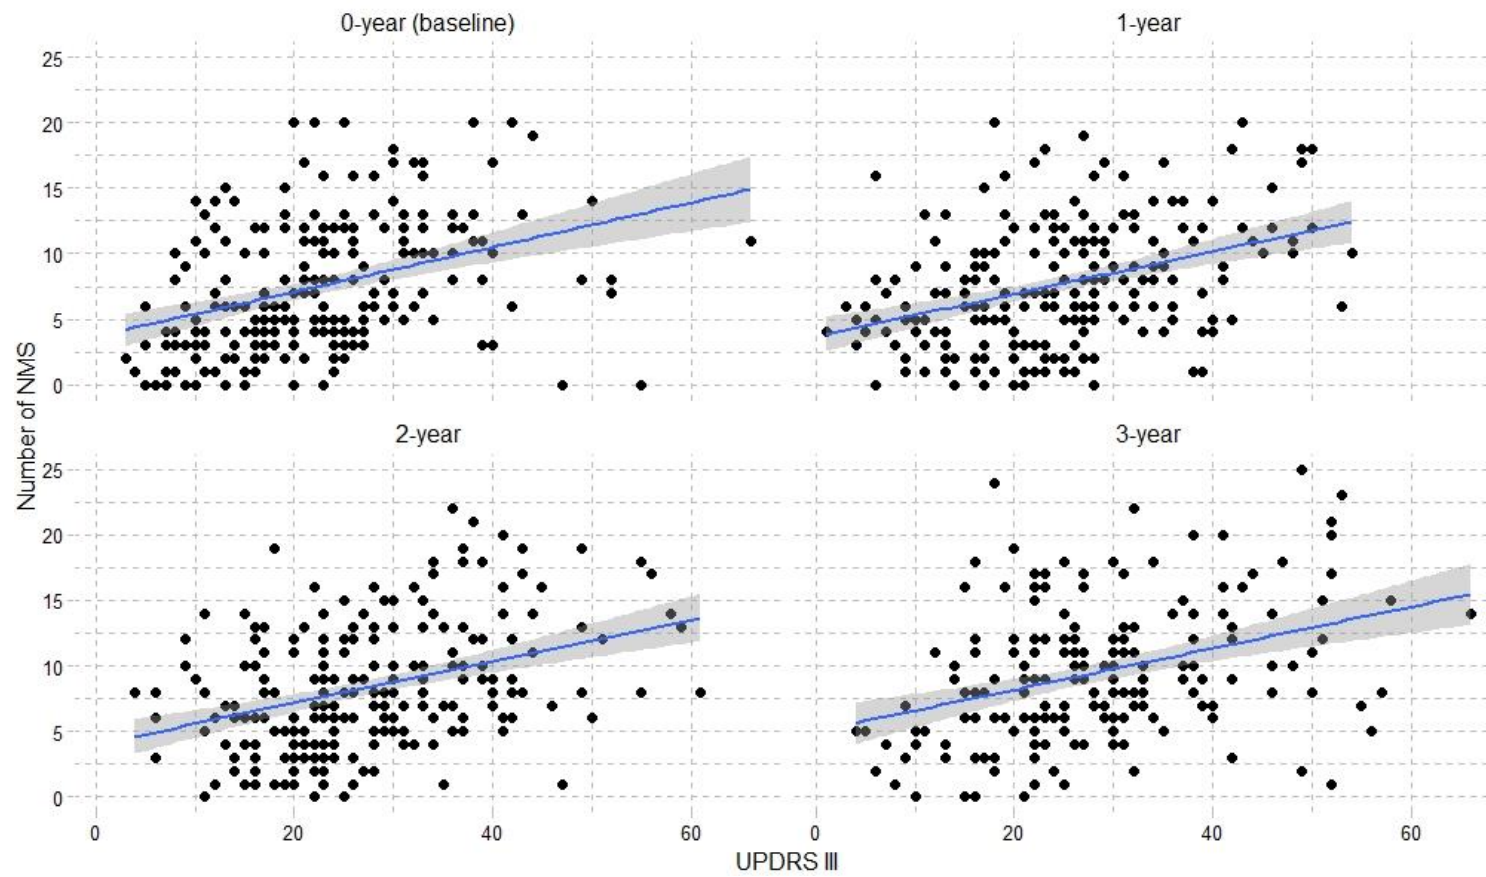

**Supplementary Figure 2 Relationship between UPDRS III score and NMS number in patients with PD over 3 years**

The fitted regression line indicated that the UPDRS III score increased with the number of NMS at each visit. Partial correlation with adjustment

for age: baseline ( $r = 0.336, P < 0.001$ ); 1-year follow-up ( $r = 0.354, P < 0.001$ ); 2-year follow-up ( $r = 0.359, P < 0.001$ ); and 3-year follow-up ( $r = 0.330, P < 0.001$ ).

Abbreviations: UDPRS, Unified Parkinson's Disease Rating Scale; NMS, non-motor symptoms; PD, Parkinson's disease.

**Supplementary Table 1 Demographic and clinical features of PD patients**

|                                 | Baseline      | 1-year        | 2-year        | 3-year        |
|---------------------------------|---------------|---------------|---------------|---------------|
| Number of samples               | 224           | 224           | 222           | 195           |
| Age, years, mean (SD)           | 57.6 (11.1)   | 59.0 (11.1)   | 60.3 (11.1)   | 61.9 (11.4)   |
| Disease duration, mean (SD)     | 1.5 (0.9)     | 2.9 (1.1)     | 4.2 (1.3)     | 5.3 (1.5)     |
| Male sex, n (%)                 | 121 (54.0)    | 121 (54.0)    | 119 (53.6)    | 108 (55.4)    |
| Education, mean (SD)            | 11.1 (3.9)    | 11.1 (3.9)    | 11.1 (4.0)    | 11.1 (4.0)    |
| LEDD, mg/day, mean (SD)         | 129.3 (175.5) | 322.4 (164.2) | 422.1 (201.0) | 468.2 (255.8) |
| Use of levodopa, n (%)          | 79 (35.3)     | 156 (69.6)    | 178 (80.2)    | 158 (81.0%)   |
| Use of dopamine receptor, n (%) | 50 (22.3)     | 136 (60.7)    | 171 (70.0)    | 152 (77.9%)   |
| Use of antidepressant, n (%)    | 10 (4.5)      | 9 (4.0)       | 18 (8.1)      | 18 (9.2)      |
| FAB score, mean (SD)            | 16.7 (1.7)    | 16.6 (1.9)    | 16.5 (1.7)    | 16.4 (1.9)    |
| MOCA score, mean (SD)           | 26.4 (2.5)    | 26.3 (3.0)    | 26.2 (2.9)    | 26.0 (3.1)    |
| HAMD score, mean (SD)           | 8.3 (7.6)     | 7.4 (6.5)     | 7.8 (6.8)     | 8.0 (6.8)     |
| HAMA score, mean (SD)           | 6.0 (5.8)     | 6.2 (5.9)     | 6.2 (5.3)     | 6.9 (6.0)     |
| NMSS score, mean (SD)           | 28.0 (24.2)   | 25.7 (22.6)   | 27.2 (21.8)   | 31.9 (28.8)   |
| UPDRS III score, mean (SD)      | 22.5 (10.8)   | 24.4 (10.9)   | 27.2 (11.2)   | 28.2 (11.7)   |

---

|                         |                |                |                |                |
|-------------------------|----------------|----------------|----------------|----------------|
| H&Y, median (quartiles) | 2.0 (1.5, 2.0) | 2.0 (2.0, 2.0) | 2.0 (2.0, 2.0) | 2.0 (2.0, 2.5) |
|-------------------------|----------------|----------------|----------------|----------------|

---

Abbreviations: PD = Parkinson's disease; SD = standard deviation; LEDD = levodopa equivalent daily dose; FAB = Frontal Assessment Battery; MOCA = Montreal Cognitive Assessment; HAMD = Hamilton Depression Rating Scale; HAMA = Hamilton Anxiety Rating Scale; NMSS = Non-Motor Symptom Scale; UPDRS = Unified Parkinson's Disease Rating Scale.

**Supplementary Table 2 Comparisons of baseline characteristics between patients with and without sexual dysfunction**

|                         | Baseline      |                |                 | 1-year        |                |                 | 2-year        |                |                 | 3-year        |                |                 |
|-------------------------|---------------|----------------|-----------------|---------------|----------------|-----------------|---------------|----------------|-----------------|---------------|----------------|-----------------|
|                         | With sexual   | Without sexual | <i>P</i> -value | With sexual   | Without sexual | <i>P</i> -value | With sexual   | Without sexual | <i>P</i> -value | With sexual   | Without sexual | <i>P</i> -value |
|                         | dysfunction   | dysfunction    |                 | dysfunction   | dysfunction    |                 | dysfunction   | dysfunction    |                 | dysfunction   | dysfunction    |                 |
| Number of samples       | 87            | 137            |                 | 76            | 148            |                 | 65            | 157            |                 | 49            | 146            |                 |
| Age                     | 59.0 (10.0)   | 56.7 (11.7)    | 0.142           | 60.9 (10.8)   | 58.0 (11.2)    | 0.068           | 59.0 (11.9)   | 60.8 (10.7)    | 0.269           | 64.0 (11.4)   | 61.2 (11.4)    | 0.135           |
| Disease duration        | 1.5 (0.8)     | 1.5 (0.9)      | 0.632           | 2.8 (1.1)     | 3.0 (1.1)      | 0.333           | 4.2 (1.4)     | 4.2 (1.2)      | 0.940           | 5.3 (1.2)     | 5.4 (1.5)      | 0.889           |
| Male sex                | 52 (60.0)     | 69 (50.4)      | 0.169           | 45 (59.2)     | 76 (51.4)      | 0.264           | 40 (61.5)     | 79 (50.3)      | 0.127           | 35 (71.4)     | 73 (50.0)      | 0.009*          |
| Education               | 10.9 (3.9)    | 11.2 (4.0)     | 0.541           | 10.9 (3.9)    | 11.2 (4.0)     | 0.554           | 11.2 (3.7)    | 11.0 (4.0)     | 0.690           | 11.0 (4.1)    | 11.2 (4.0)     | 0.796           |
| LEDD                    | 137.6 (168.4) | 124.0 (180.3)  | 0.573           | 325.7 (162.9) | 320.7 (165.4)  | 0.830           | 404.2 (200.3) | 429.5 (201.5)  | 0.395           | 519.6 (238.9) | 450.9 (257.1)  | 0.101           |
| Use of levodopa         | 34 (39.1)     | 45 (32.8)      | 0.341           | 59 (77.6)     | 97 (65.5)      | 0.062           | 53 (81.5)     | 125 (79.6)     | 0.744           | 45 (91.8)     | 113 (77.4)     | 0.026*          |
| Use of dopamine agonist | 21 (24.1)     | 29 (21.2)      | 0.603           | 39 (51.3)     | 97 (65.5)      | 0.039*          | 45 (69.2)     | 126 (80.3)     | 0.076           | 41 (83.7)     | 111 (76.0)     | 0.264           |
| Use of antidepressant   | 4 (4.6)       | 6 (4.4)        | 1.000           | 3 (3.9)       | 6 (4.1)        | 1.000           | 3 (4.6)       | 15 (9.6)       | 0.220           | 4 (8.2)       | 14 (9.6)       | 1.000           |
| FAB                     | 16.7 (1.6)    | 16.7 (1.8)     | 0.726           | 16.3 (2.0)    | 16.7 (1.8)     | 0.128           | 16.5 (1.7)    | 16.5 (1.7)     | 0.898           | 16.0 (2.2)    | 16.6 (1.8)     | 0.069           |
| MOCA                    | 26.4 (2.5)    | 26.4 (2.5)     | 0.889           | 25.9 (3.0)    | 26.5 (3.0)     | 0.180           | 26.3 (2.8)    | 26.2 (2.9)     | 0.820           | 25.6 (3.4)    | 26.1 (3.0)     | 0.313           |
| HAMD                    | 9.9 (8.3)     | 7.3 (6.9)      | 0.016*          | 8.3 (6.9)     | 6.9 (6.3)      | 0.140           | 9.9 (7.5)     | 7.0 (6.2)      | 0.006*          | 10.9 (7.6)    | 7.0 (6.3)      | 0.002*          |

|           |                |                |        |                |                |       |                |                |        |                |                |         |
|-----------|----------------|----------------|--------|----------------|----------------|-------|----------------|----------------|--------|----------------|----------------|---------|
| HAMA      | 7.1 (6.0)      | 5.2 (5.5)      | 0.021* | 6.4 (5.8)      | 6.1 (5.9)      | 0.702 | 7.9 (6.0)      | 5.5 (4.9)      | 0.005* | 8.8 (6.1)      | 6.2 (5.8)      | 0.010*  |
| UPDRS III | 23.5 (10.2)    | 21.9 (11.1)    | 0.267  | 26.3 (11.0)    | 23.5 (10.7)    | 0.060 | 28.1 (13.2)    | 26.9 (10.3)    | 0.519  | 33.6 (10.8)    | 26.5 (11.5)    | <0.001* |
| H&Y stage | 2.0 (2.0, 2.0) | 2.0 (1.0, 2.0) | 0.140  | 2.0 (2.0, 2.0) | 2.0 (2.0, 2.0) | 0.202 | 2.0 (2.0, 2.0) | 2.0 (2.0, 2.0) | 0.499  | 2.0 (2.0, 2.5) | 2.0 (2.0, 2.0) | 0.007*  |

Abbreviations: LEDD = levodopa equivalent daily dose; FAB = frontal assessment battery; MOCA = Montreal Cognitive Assessment; HAMD = Hamilton Depression

Rating Scale; HAMA = Hamilton Anxiety Rating Scale; UPDRS = Unified Parkinson's Disease Rating Scale.

\* Significant difference.



**Supplementary Table 3 Number of patients with changed drugs use among different sexual dysfunction group**

| Sexual dysfunction              | Levodopa  |           |           |           | Dopamine agonist |           |           |           | Antidepressant |          |         |          |
|---------------------------------|-----------|-----------|-----------|-----------|------------------|-----------|-----------|-----------|----------------|----------|---------|----------|
|                                 | --        | -+        | +-        | ++        | --               | -+        | +-        | ++        | --             | -+       | +-      | ++       |
| From baseline to 1-year (n=224) |           |           |           |           |                  |           |           |           |                |          |         |          |
| Group 1 (n=105)                 | 30 (28.6) | 41 (39.0) | 5 (4.8)   | 29 (27.6) | 26 (24.8)        | 53 (50.5) | 10 (9.5)  | 16 (15.2) | 99 (94.3)      | 1 (1.0)  | 2 (1.9) | 3 (28.6) |
| Group 2 (n=32)                  | 9 (28.1)  | 12 (37.5) | 0         | 11 (34.4) | 17 (53.1)        | 12 (37.5) | 1 (3.1)   | 2 (6.3)   | 30 (93.8)      | 1 (3.1)  | 0       | 1 (3.1)  |
| Group 3 (n=43)                  | 14 (32.6) | 12 (27.9) | 2 (4.7)   | 15 (34.9) | 13 (30.2)        | 21 (48.8) | 2 (4.7)   | 7 (16.3)  | 39 (90.7)      | 1 (2.3)  | 2 (4.7) | 1 (2.3)  |
| Group 4 (n=44)                  | 7 (15.9)  | 20 (45.5) | 1 (2.3)   | 16 (36.4) | 14 (31.8)        | 18 (40.9) | 5 (11.4)  | 7 (15.9)  | 42 (95.5)      | 1 (2.3)  | 1 (2.3) | 0        |
| From 1-year to 2-year (n=222)   |           |           |           |           |                  |           |           |           |                |          |         |          |
| Group 1 (n=112)                 | 25 (22.3) | 13 (11.6) | 1 (0.9)   | 73 (65.2) | 21 (18.8)        | 15 (13.4) | 0         | 76 (67.9) | 98 (87.5)      | 9 (8.0)  | 3 (2.7) | 2 (1.8)  |
| Group 2 (n=34)                  | 6 (17.6)  | 7 (20.6)  | 0         | 21 (61.8) | 6 (17.6)         | 8 (23.5)  | 4 (11.8)  | 16 (47.1) | 32 (94.1)      | 1 (2.9)  | 0       | 1 (2.9)  |
| Group 3 (n=45)                  | 6 (13.3)  | 2 (4.4)   | 0         | 37 (82.2) | 9 (20.0)         | 13 (28.9) | 1 (2.3)   | 22 (48.9) | 40 (88.9)      | 3 (6.7)  | 1 (2.3) | 1 (2.3)  |
| Group 4 (n=31)                  | 6 (19.4)  | 3 (9.7)   | 0         | 22 (71.0) | 7 (22.6)         | 8 (25.8)  | 3 (9.7)   | 13 (42.0) | 29 (93.5)      | 1 (3.2)  | 1 (3.2) | 0        |
| From 2-year to 3-year (n=195)   |           |           |           |           |                  |           |           |           |                |          |         |          |
| Group 1 (n=106)                 | 14 (13.2) | 7 (6.6)   | 12 (11.3) | 73 (68.9) | 12 (11.3)        | 8 (7.5)   | 17 (16.0) | 69 (65.1) | 94 (88.7)      | 2 (18.9) | 2 (1.9) | 8 (7.5)  |
| Group 2 (n=30)                  | 0         | 4 (13.3)  | 0         | 26 (86.7) | 2 (6.7)          | 7 (23.3)  | 0         | 21 (70.0) | 24 (80.0)      | 1 (3.3)  | 2 (6.7) | 3 (10.0) |
| Group 3 (n=40)                  | 7 (17.5)  | 0         | 0         | 33 (82.5) | 6 (15.0)         | 5 (12.5)  | 0         | 29 (72.5) | 35 (87.5)      | 2 (5.0)  | 1 (2.5) | 2 (5.0)  |
| Group 4 (n=19)                  | 4 (21.1)  | 0         | 0         | 15 (78.9) | 5 (26.3)         | 2 (10.5)  | 1 (5.3)   | 11 (57.9) | 19 (100.0)     | 0        | 0       | 0        |

Group 1: patients had no sexual dysfunction at both two visits.

Group 2: patients had no sexual dysfunction at visit 1 but had sexual dysfunction at visit 2.

Group 3: patients had sexual dysfunction at visit 1 but had no sexual dysfunction at visit 2.

Group 4: patients had sexual dysfunction at both two visits.

--: patients did not use drugs at both two visits.

-+: patients used drugs at visit 1 but did not at visit 2.

+ -: patients did not use drugs at visit 1 but used at visit 2.

++: patients used drugs at both two visits.

**Supplementary Table 4 Factors associated with the presence of sexual dysfunction in patients with PD**

|                         | Unadjusted model |             |                 | Adjusted model |             |                 |
|-------------------------|------------------|-------------|-----------------|----------------|-------------|-----------------|
|                         | OR               | 95%CI       | <i>P</i> -value | OR             | 95%CI       | <i>P</i> -value |
| Age                     | 1.009            | 0.994-1.025 | 0.245           | 1.011          | 0.996-1.027 | 0.160           |
| Disease duration        | 0.888            | 0.813-0.969 | 0.008*          | 0.860          | 0.777-0.951 | 0.003*          |
| Male sex                | 1.605            | 1.147-2.246 | 0.006*          | 1.646          | 1.162-2.331 | 0.005*          |
| Education               | 0.990            | 0.947-1.035 | 0.654           |                |             |                 |
| LEDD                    | 1.000            | 0.999-1.000 | 0.325           |                |             |                 |
| Use of levodopa         | 1.216            | 0.900-1.642 | 0.203           |                |             |                 |
| Use of dopamine agonist | 0.691            | 0.510-0.935 | 0.017*          | 0.816          | 0.580-1.149 | 0.244           |
| Use of antidepressant   | 0.710            | 0.392-1.288 | 0.260           |                |             |                 |
| FAB                     | 0.939            | 0.859-1.026 | 0.164           |                |             |                 |
| MOCA                    | 0.975            | 0.920-1.034 | 0.397           |                |             |                 |
| HAMD                    | 1.054            | 1.031-1.078 | <0.001*         | 1.059          | 1.019-1.100 | 0.003*          |
| HAMA                    | 1.049            | 1.021-1.078 | <0.001*         | 0.995          | 0.951-1.040 | 0.823           |
| UPDRS III               | 1.019            | 1.004-1.033 | 0.013*          | 1.012          | 0.995-1.028 | 0.165           |

Abbreviations: PD = Parkinson's disease; LEDD = levodopa equivalent daily dose; FAB = frontal assessment battery; MOCA = Montreal Cognitive Assessment;

HAMD = Hamilton Depression Rating Scale; HAMA = Hamilton Anxiety Rating Scale; UPDRS = Unified Parkinson's Disease Rating Scale.

\* Significant difference.
